# Supplementary material
Source: PubMed Central journal article supplement (PMC5113303)
Supplement: cr2016108x1.pdf [file cr2016108x1.pdf]

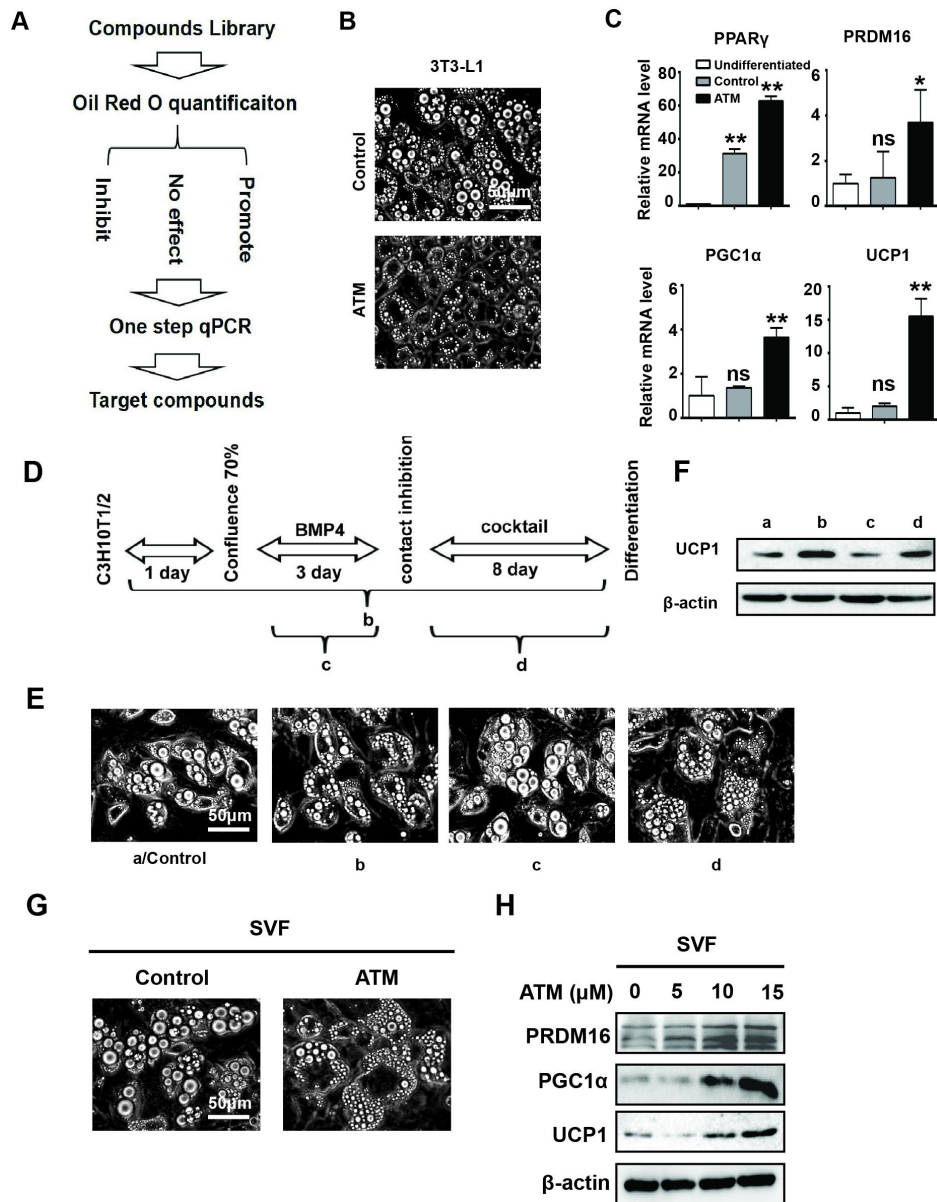

Supplementary information Figure S1 High-throughput screening in 3T3-L1 and validation of the browning effect of ATM in C3H10T1/2 and SVF.

(A) The flow chart of high-throughput screenings.

(B) The morphological change caused by ATM in 3T3-L1(day 8).

(C) Transcriptional level of browning related genes in 3T3-L1 (day 8) treated with or without ATM, detected by one-step qPCR, \* $p < 0.05$ , \*\* $p < 0.01$ ; student's  $t$  test,  $n = 3$ .

(D) The schema of treating BMP4-committed C3H10T1/2 in the different phase by ATM.

(E) The morphological alteration induced by ATM when treating BMP4-committed C3H10T1/2 in different phase.

(F) Western blotting of UCP1 when treating BMP4-committed C3H10T1/2 in different phase with ATM.

(G) The morphological alteration induced by ATM (15  $\mu$ M) when treating SVF for 8 days.

(H) Western blotting of UCP1 when treating SVF with different doses of ATM for 8 days.
